# Supplementary material for: A Novel and Direct Metamobilome Approach improves the Detection of Larger-sized Circular Elements across Kingdoms
Source: bioRxiv or medRxiv preprint supplement (doi:10.1101/761098), 2019-10-09
Supplement: Supplementary file [file media-1.pdf]

## Supplementary

S1: Hits for full length sequence blasting in megablast

| Circular element                | Hits                                                                   | E-value | Query cover |
|---------------------------------|------------------------------------------------------------------------|---------|-------------|
| RNODE_1224 (1,676 bp)           | Transposase for IS481 element from <i>Pseudomonas fluorescens</i> F113 | 0.0     | 84%         |
| RNODE_961 (3,425 bp)            | Plasmid pSFKW33 form <i>Shewanella</i> sp. 33B                         | 6e-133  | 12%         |
| RNODE_1264 (6,343 bp)           | <i>Escherichia coli</i> strain ECONIH4 plasmid pKPC-b33e               | 1e-172  | 14%         |
| RNODE_1311 (7,919 bp)           | <i>Polaromonas</i> sp. H8N plasmid pH8NP1                              | 5e-19   | 1%          |
| pWWmer (12,145 bp)              | <i>Pseudomonas citronellolis</i> strain SJTE-3 (genome)                | 0.004   | 1%          |
| pWWvir (12,273 bp)              | <i>Pseudomonas</i> sp. strain ANT_H54B plasmid pA54BH1                 | 1e-168  | 14%         |
| Temperate phage e14 (15,204 bp) | <i>Escherichia coli</i> strain K-12 MG1655                             | 0.0     | 100%        |
| pWWtox (17,568 bp)              | <i>Acidiphilium cryptum</i> JF-5 plasmid pACRY04                       | 7e-167  | 14%         |
| RNODE_1158 (21,098 bp)          | <i>Sphingobium chlorophenolicum</i> L-1 plasmid pSPHCH01               | 0.0     | 24%         |
| pWWcol (23,316 bp)              | <i>Bacillus cereus</i> strain AR156 (genome)                           | 5e-31   | 1%          |
