# Supplementary material for: A Novel and Direct Metamobilome Approach improves the Detection of Larger-sized Circular Elements across Kingdoms
Source: bioRxiv or medRxiv preprint supplement (doi:10.1101/761098), 2019-10-09
Supplement: Supplementary file [file media-2.pdf]

## Supplementary

S2: Complete list of all identified Open reading frames (ORFs) for each of the 10 annotated plasmids. ND: not determined

| Contig (circular element) | # identified ORFs | # of hypothetical al | Plasmid/Phage/Transposons related proteins                                                                                                                                            | Potential accessory proteins                                                     |
|---------------------------|-------------------|----------------------|---------------------------------------------------------------------------------------------------------------------------------------------------------------------------------------|----------------------------------------------------------------------------------|
| pWWcol                    | 32                | 29                   | ND                                                                                                                                                                                    | Collagen like protein, Primase, VirE                                             |
| RNODE_1158                | 26                | 16                   | Recombinase, Type IV secretory system<br>Conjugative DNA transfer, TraD/Mobilization protein, MobA/MobL, Putative toxin VapC6, Recombinase x2, ParA, and RepB. Tn3 family transposase | Thermonuclease                                                                   |
| pWWtox                    | 25                | 10                   | Site-specific integrase, Toxin-antitoxin x2, AbiEii, Nicking enzyme, TraD, MobA/MobL, and RepB.                                                                                       | PEP-CTERM domain, CbiA, DNA (cytosine-5-)methyltransferase, endonuclease, EcoRII |
| Temperate phage e14       | 29                | 5                    | Recombinase, YmfE, Lit, Integrase, Excisionase-like proteins, LexA repressor, YmfL, Terminase, YmfR, Baseplate J-like protein, YmfQ, Tfp x2 and Tfp x2                                | mcrA, Isocitrate dehydrogenase, SAM-dependent methyltransferase                  |
| pWWvir                    | 15                | 6                    | KfrA_N, ParG, ParA, VirD1, Mob, Rep, and Site-specific recombinase                                                                                                                    | NotI and DNA-cytosine methyltransferase                                          |
| pWWmer                    | 13                | 7                    | Protelomerase. YafQ toxin. RelB antitoxin, Helicase domaine, and DNA primase                                                                                                          | merR.                                                                            |
| RNODE_1311                | 8                 | 3                    | DNaB replicative DNA helicase, Toxin-antitoxin, Recombinase, ParA, and DNA primase.                                                                                                   | ND                                                                               |
| RNODE_1264                | 6                 | 1                    | KfrA_N, MobC, RepB, RepA, and RepC.                                                                                                                                                   | ND                                                                               |
| RNODE_961                 | 7                 | 5                    | Replication initiator protein                                                                                                                                                         | Integrase                                                                        |
| RNODE_1224                | 3                 | 1                    | IS481 family transposase                                                                                                                                                              | ND                                                                               |
